# Supplementary material for: A novel mitochondrial-targeting fluorescent probe based on 1,4-dihydropyridine to visualize and monitor the viscosity of live cells and mice in vivo
Source: Royal Society of Chemistry journal article supplement (doi:10.1039/d1ay01206a), 2021-01-01
Supplement: d1ay01206a1.pdf [file d1ay01206a1.pdf]

### ***Electronic Supporting Information (ESI) for***

A novel mitochondrial-targeted fluorescent probe with two rotors based on 1,4-dihydropyridine, visualize and monitor the viscosity of live cells and mice in vivo  
Longqi Xue<sup>1</sup>, Jialin Lv<sup>3</sup>, Ronghang Li<sup>4</sup>, Xinyu Wang<sup>2</sup>, Yapeng Li<sup>1</sup>, Jianshi Du<sup>2</sup>,  
Shaolong Qi<sup>2</sup>, Qingbiao Yang<sup>1, 2,\*</sup>, Yaming Shan<sup>3,\*</sup> and Yaoxian Li<sup>1</sup>

<sup>1</sup>College of Chemistry, Jilin University, Changchun 130021, Jilin, China

<sup>2</sup>Key Laboratory of Lymphatic Surgery Jilin Province, Engineering Laboratory of Lymphatic Surgery Jilin Province, China-Japan Union Hospital of Jilin University, Changchun 130031, Jilin, China

<sup>3</sup>National Engineering Laboratory of AIDS Vaccine, School of Life Sciences, Jilin University, Changchun, China

<sup>4</sup>Department of Joint Surgery and Sports Medicine, The Second Hospital of Jilin University, Changchun, 130041, Jilin, China

#### Theoretical calculation method

The calculations are performed through DFT (density functional theory) and TDDFT (time shift DFT) on the B3LYP/6-31G (d, p) level of the Gaussian 09 program. The hole electron distribution analysis was performed using the Multiwfn program. PCM solvation model was used with water as solvent in all the calculations.

#### Cytotoxicity experiments and fluorescence imaging

We used standard CCK8 to evaluate the cytotoxicity of probe PTI. The specific experimental steps are as follows: After the HeLa cells are resuscitated, place an appropriate amount of the cell line in the culture medium and culture it in a constant temperature incubator at 37°C and 5% CO<sub>2</sub>. The medium is made up of 10% fetal bovine serum, 1% penicillin streptomycin double antibody DMEM high glucose medium. Take the HeLa cells that survive the logarithmic growth phase in a centrifuge tube,

centrifuge, remove the supernatant, add 2 ml of medium, and blow evenly. Then take 10 ml of cell suspension and dilute to ten times. Pipette 1  $\mu\text{L}$  of cell suspension and place it in the counting chamber of the cell counting plate. Count directly under the microscope to calculate the average value  $n$ , which is calculated by the formula:  $\text{cell number/mL} = n \times 10 \times 10^4 / \text{ml}$ . Take an appropriate amount of cell suspension by calculation and place it in a 96-well plate to ensure that the constant volume is 100  $\mu\text{L}$  per well, and each well contains approximately  $1 \times 10^4$  cells. Then put it in a 37  $^\circ\text{C}$ , 5%  $\text{CO}_2$  incubator for 24 h. After the cells adhere to the wall, remove the culture medium, rinse 3 times with PBS buffer solution, add probes and culture medium, probe concentrations are 0, 5, 10, 15, 20, 50, 100, 200 mM, 5 wells in each group. Then place it in a 37  $^\circ\text{C}$ , 5%  $\text{CO}_2$  incubator and continue to incubate for 24 h. After taking it out, add 10  $\mu\text{L}$  of LCCK8 solution to each well, incubate it in an incubator for 4 h, and measure the absorbance at 450 nm with a microplate reader. Then carry out three parallel tests and take the average value. The cell survival rate is calculated by the following formula:

$$\text{Cell survival rate (\%)} = \frac{A(\text{adding medicine}) - A(\text{blank})}{[A(0 \text{ adding medicine}) - A(\text{blank})]} \times 100\%$$

A (addition): absorbance value of experimental group; A (addition of 0): absorbance value of control group; A (blank): absorbance value of blank group

Cell fluorescence imaging test: The test is divided into three groups: A HeLa cells + probe N (10.0  $\mu\text{M}$ ); B HeLa cells + probe PTI (10.0  $\mu\text{M}$ ) + Mon; C HeLa cells + probe PTI (10.0  $\mu\text{M}$ ) + Nys . Take the cells in the logarithmic growth phase and dilute to a cell suspension of  $2.0 \times 10^4$  cells, place them in a petri dish, and culture them in a 37°C, 5% CO<sub>2</sub> incubator for 24 h. After the cells adhere to the wall, remove the medium, and rinse three times with buffer PBS. Then add the probe solution (10.0  $\mu\text{M}$ ) prepared by the culture medium to group A, group B and group C, and place them in a 37 °C, 5% CO<sub>2</sub> incubator for 30 min, then add PBS buffer solution to group A, group B Add the same amount of PBS buffer prepared by Mon, and add the same amount of PBS buffer prepared by Nys to group C, then continue to incubate for 30 min, and observe the cell imaging with a laser confocal microscope.

#### Fluorescence imaging in living mice

Select Kunming mice for the experiment. The handling of mice complies with the requirements of the Animal Ethics Committee of Jilin University. LPS, Mon, Nys and normal saline were injected into the abdominal cavity of mice. After 12 h, 100  $\mu\text{L}$  of the probe sample (2 mM) was injected into the mice by tail vein injection. One hour later, the mice were anesthetized by injecting 100  $\mu\text{L}$  of 1% sodium pentobarbital. After general anesthesia, the abdomen was depilated with depilatory cream and photographed with a small animal in vivo imager.

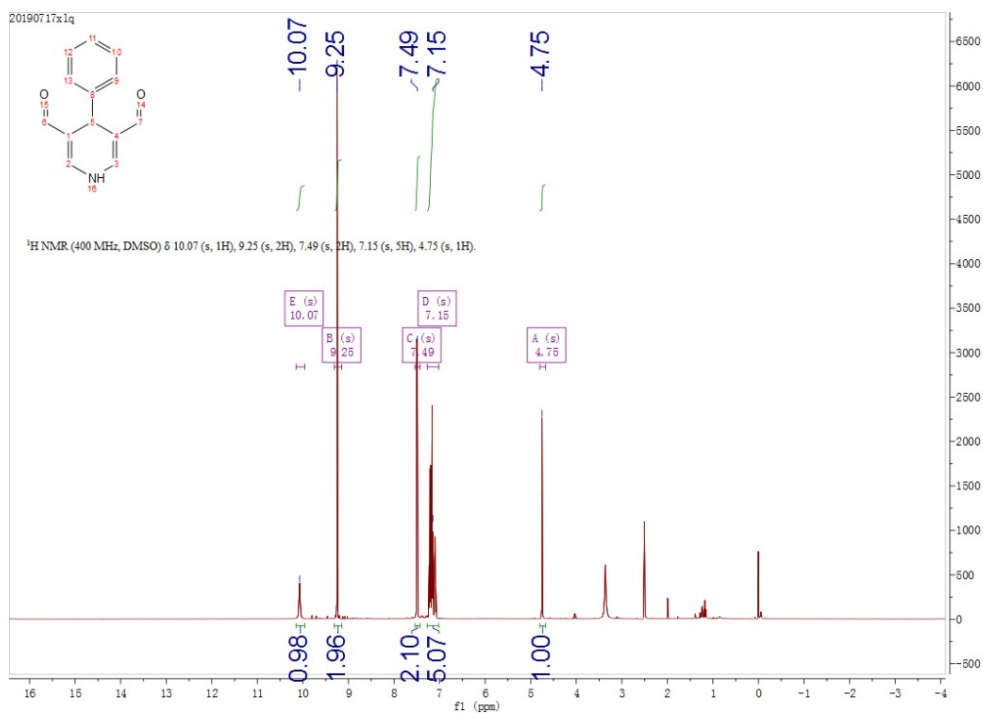

Figure S1 <sup>1</sup>H NMR spectrum of Compound 1 in DMSO-d<sub>6</sub>.

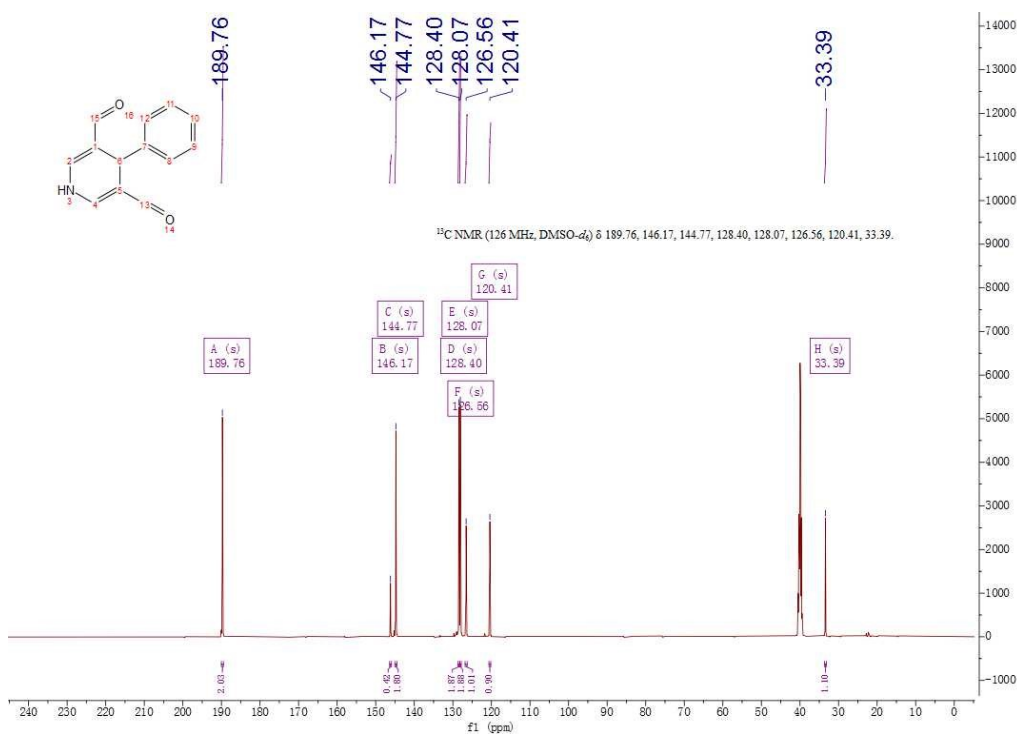

Figure S2 <sup>13</sup>C NMR spectrum of Compound 1 in DMSO-d<sub>6</sub>.

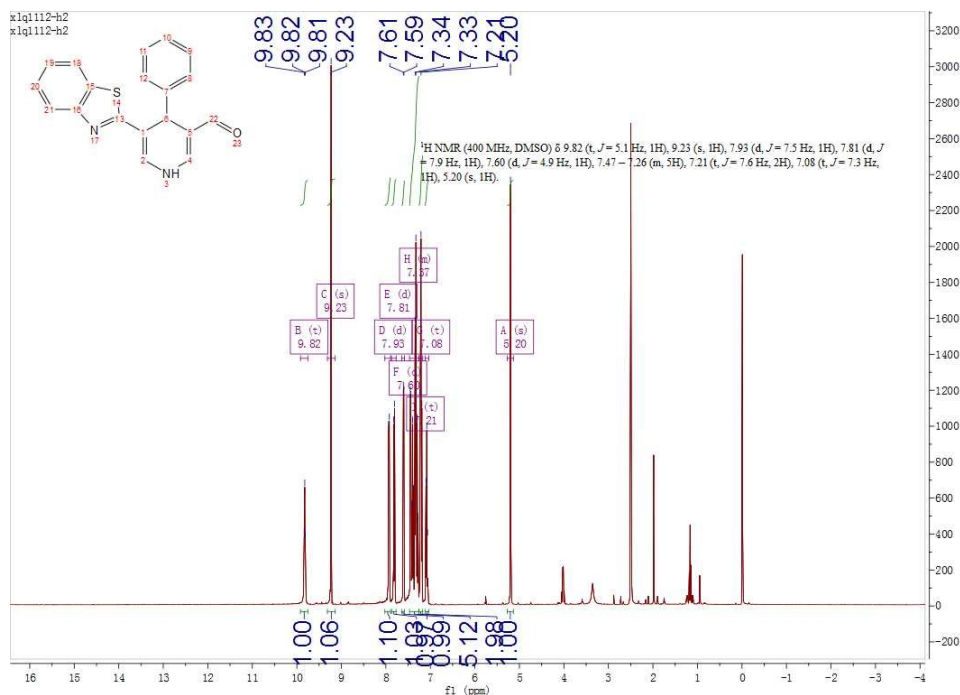

Figure S3 <sup>1</sup>H NMR spectrum of Compound 2 in DMSO-d<sub>6</sub>.

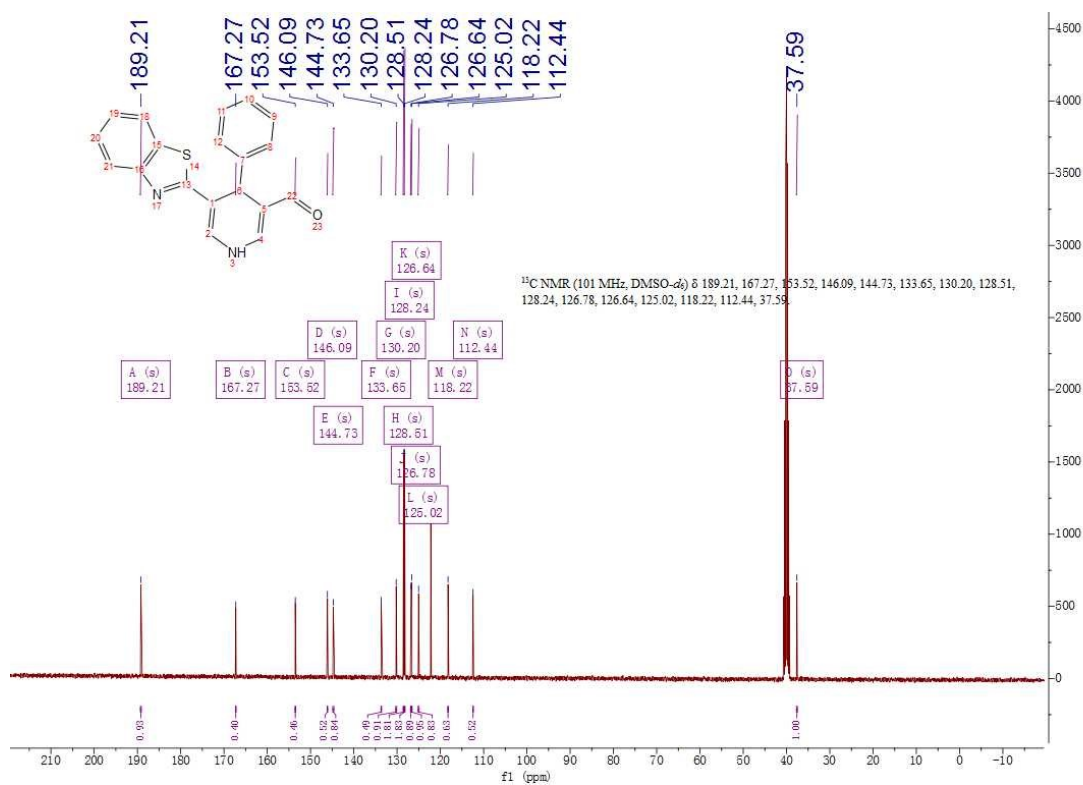

Figure S4 <sup>13</sup>C NMR spectrum of Compound 2 in DMSO-d<sub>6</sub>.

Synthesis of compound 3: Compound 1 (0.213 g, 1.0 mmol) and 1,2,3,3-tetramethyl-3H-indolium iodide (0.30 g, 1.0 mmol) were added to a 50 ml single-necked flask. Add 20 ml of ethanol, add two drops of piperidine, and under the protection of nitrogen, the reaction was stirred at 85°C under reflux overnight. The solvent was removed, and the obtained crude product was separated by

dichloromethane/methanol (100:1, v/v) column chromatography, and finally 0.36 g of a red solid was obtained with a yield of 72%. <sup>1</sup>H NMR (400 MHz, DMSO-*d*<sub>6</sub>) δ 10.76 (s, 1H), 9.30 (s, 1H), 8.17 (d, *J* = 15.4 Hz, 1H), 8.00 (s, 1H), 7.68 (dd, *J* = 19.5, 7.7 Hz, 2H), 7.60 – 7.38 (m, 5H), 7.29 (t, *J* = 7.6 Hz, 2H), 7.15 (t, *J* = 7.3 Hz, 1H), 6.44 (d, *J* = 15.4 Hz, 1H), 5.10 (s, 1H), 3.76 (s, 3H), 1.60 (d, *J* = 8.8 Hz, 6H). <sup>13</sup>C NMR (101 MHz, DMSO-*d*<sub>6</sub>) δ 189.94, 179.72, 154.92, 145.16, 144.81, 142.76, 142.36, 129.11, 128.81, 128.57, 128.09, 127.24, 123.03, 122.46, 119.21, 114.16, 105.55, 51.23, 35.68, 33.33, 26.54, 26.16. MS, *m/z* calcd. for C<sub>25</sub>H<sub>25</sub>N<sub>2</sub>O<sup>+</sup>:369.1961; found[M]<sup>+</sup>: 369.1951.

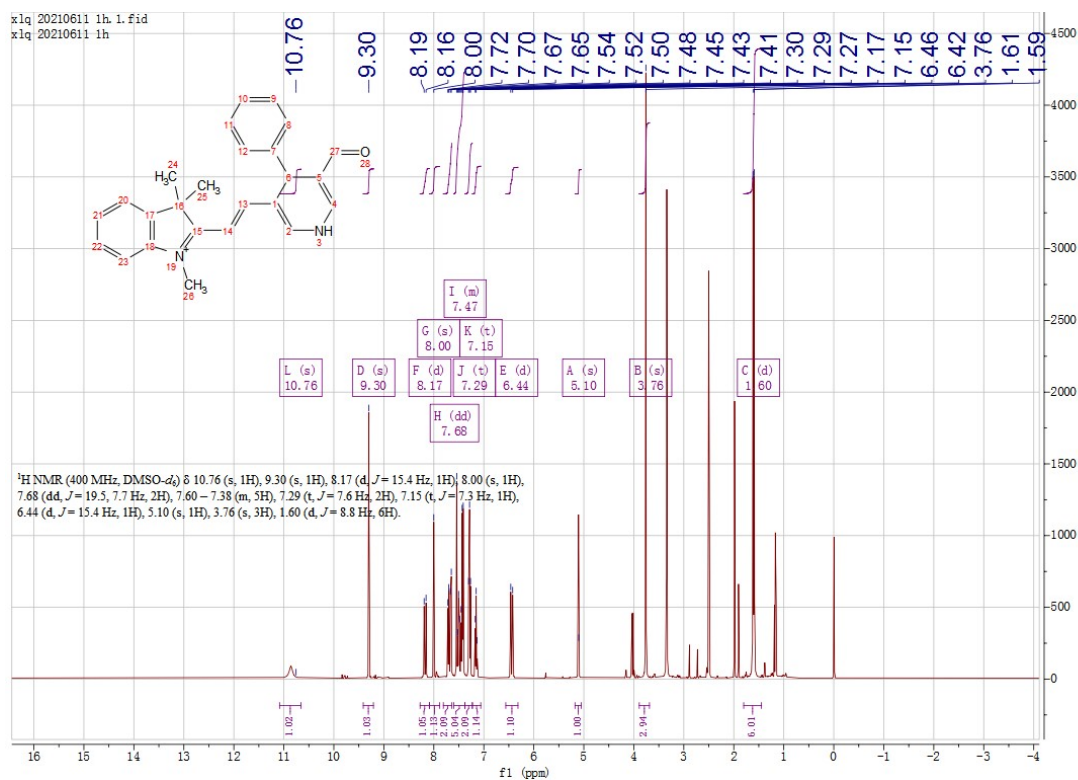

Figure S5 <sup>1</sup>H NMR spectrum of Compound 3 in DMSO-*d*<sub>6</sub>.

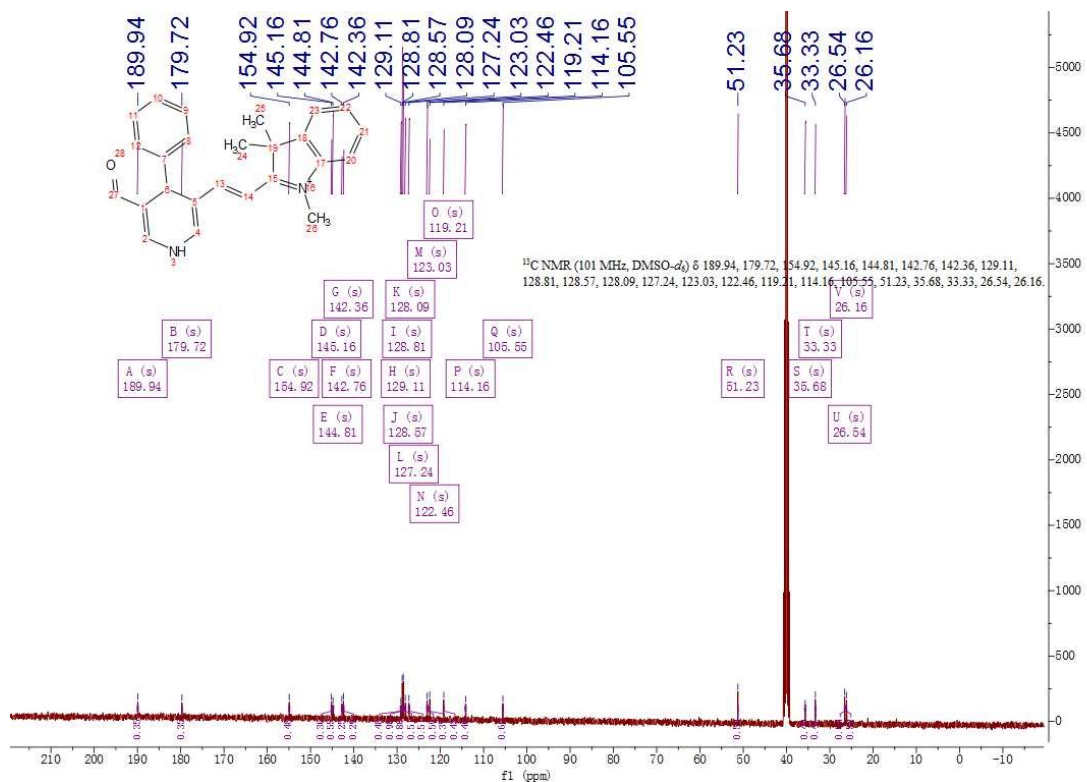

Figure S6 <sup>13</sup>C NMR spectrum of Compound 3 in DMSO-d<sub>6</sub>.

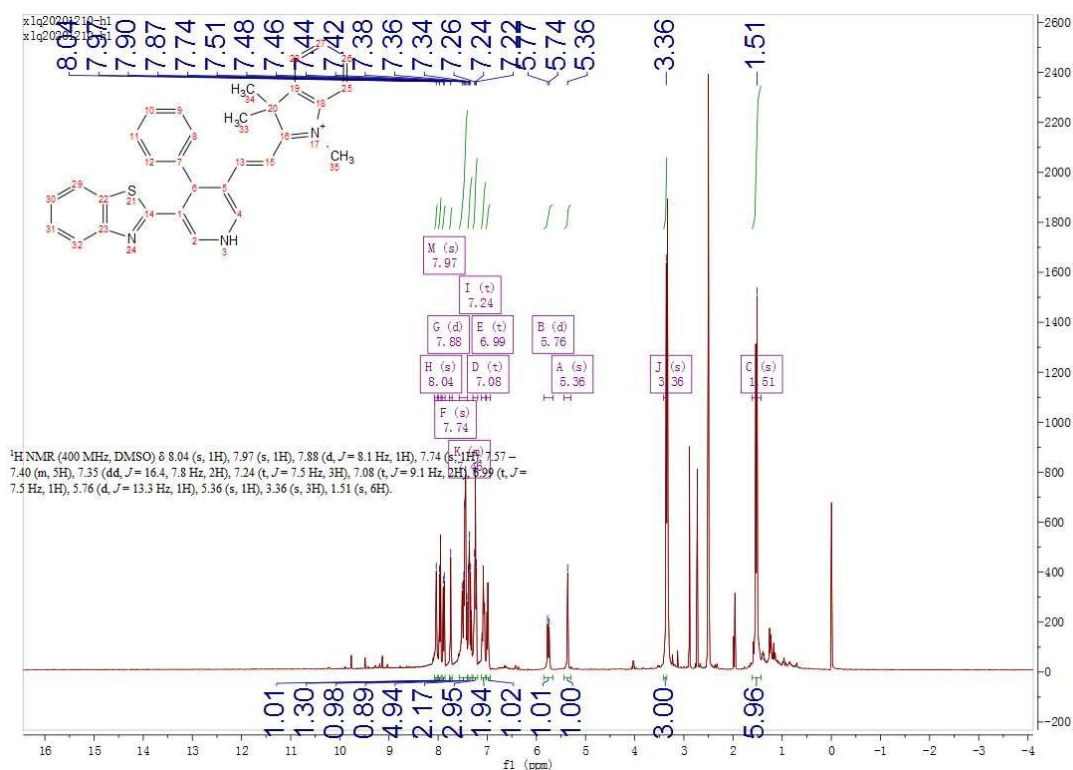

Figure S7 <sup>1</sup>H NMR spectrum of Compound PTI in DMSO-d<sub>6</sub>.

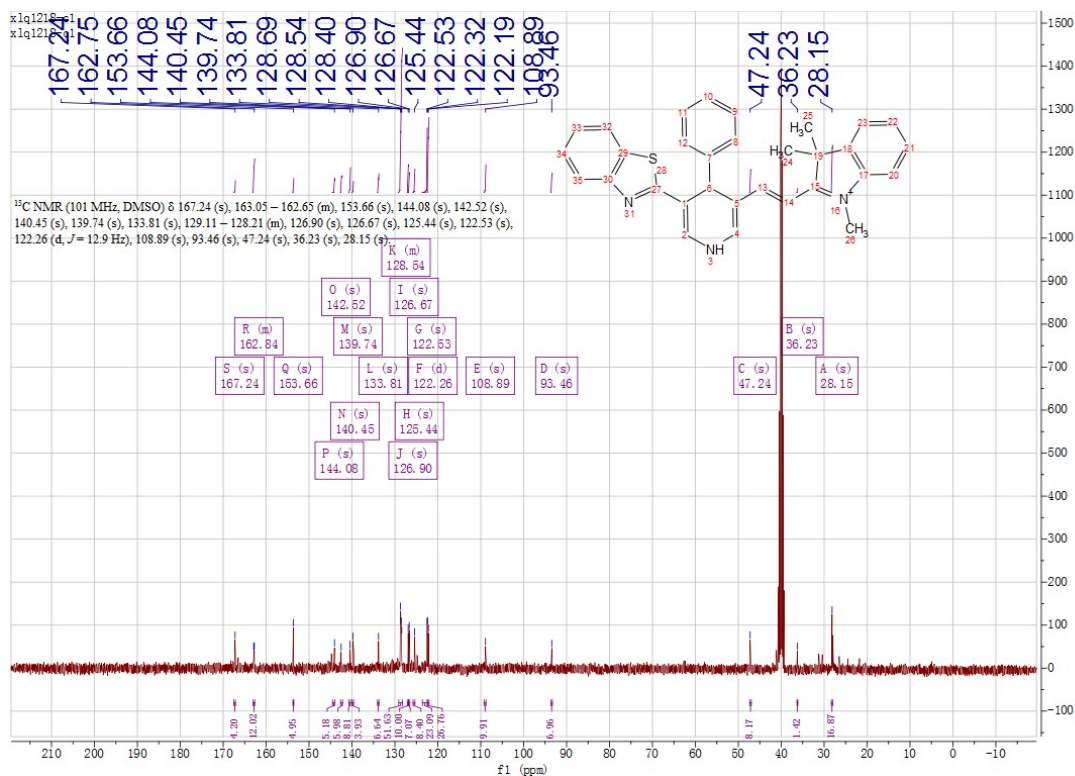

Figure S8 <sup>13</sup>C NMR spectrum of Compound PTI in DMSO-d<sub>6</sub>.

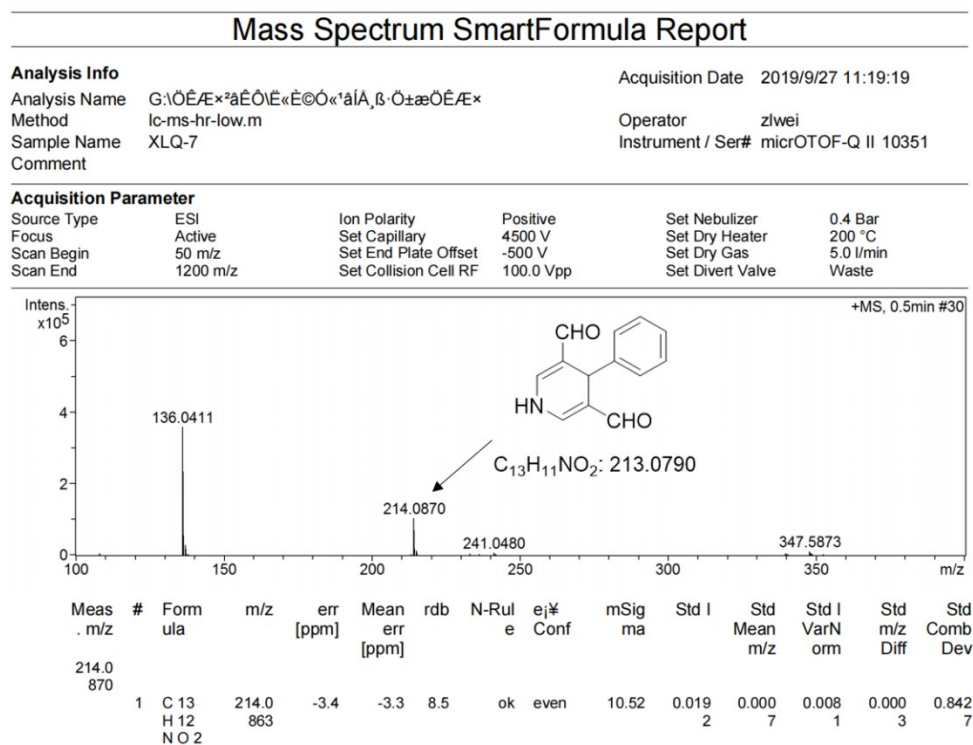

Figure S9 High-resolution mass spectra of Compound 1.



## Mass Spectrum SmartFormula Report

### Analysis Info

Analysis Name C:\Users\Administrator\Desktop\XLQ-1\_P1-E-1\_01\_21257.d  
 Method lc-ms-hr-low.m  
 Sample Name XLQ-1  
 Comment

Acquisition Date 2021/8/7 14:44:37  
 Operator zlwei  
 Instrument / Ser# micrOTOF-Q II 10351

### Acquisition Parameter

|             |          |                       |           |                  |           |
|-------------|----------|-----------------------|-----------|------------------|-----------|
| Source Type | ESI      | Ion Polarity          | Positive  | Set Nebulizer    | 0.6 Bar   |
| Focus       | Active   | Set Capillary         | 4500 V    | Set Dry Heater   | 200 °C    |
| Scan Begin  | 50 m/z   | Set End Plate Offset  | -500 V    | Set Dry Gas      | 8.0 l/min |
| Scan End    | 1200 m/z | Set Collision Cell RF | 100.0 Vpp | Set Divert Valve | Waste     |

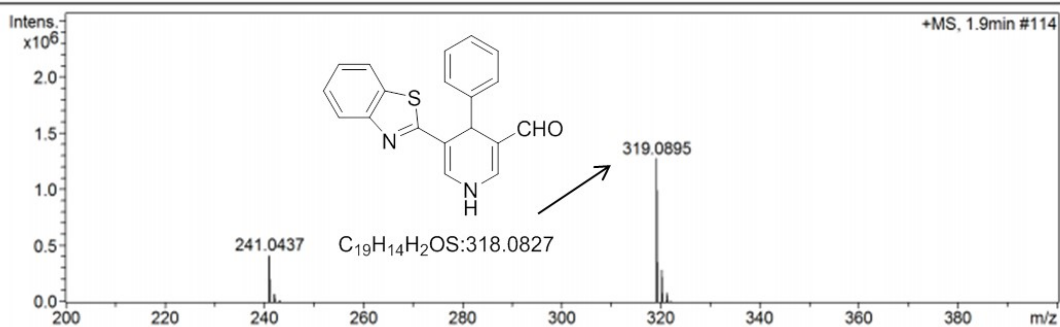

| Meas. m/z | # | Formula                                          | m/z      | err [ppm] | Mean err [ppm] | rdb  | N-Rule | Charge | Conf | mSigma | Std I  | Std Mean m/z | Std VarNorm | Std m/z Diff | Std Com Dev |
|-----------|---|--------------------------------------------------|----------|-----------|----------------|------|--------|--------|------|--------|--------|--------------|-------------|--------------|-------------|
| 319.0895  | 1 | C <sub>19</sub> H <sub>15</sub> N <sub>2</sub> O | 319.0900 | 1.5       | 1.0            | 13.5 | ok     | even   |      | 2.23   | 0.0042 | 0.0006       | 0.0017      | 0.0015       | 0.8427      |

Figure S10 High-resolution mass spectra of Compound 2.

## Mass Spectrum SmartFormula Report

### Analysis Info

Analysis Name C:\Users\Administrator\Desktop\XLQ-2\_P1-E-2\_01\_21258.d  
 Method lc-ms-hr-low.m  
 Sample Name XLQ-2  
 Comment

Acquisition Date 2021/8/7 14:51:00  
 Operator zlwei  
 Instrument / Ser# micrOTOF-Q II 10351

### Acquisition Parameter

|             |          |                       |           |                  |           |
|-------------|----------|-----------------------|-----------|------------------|-----------|
| Source Type | ESI      | Ion Polarity          | Positive  | Set Nebulizer    | 0.6 Bar   |
| Focus       | Active   | Set Capillary         | 4500 V    | Set Dry Heater   | 200 °C    |
| Scan Begin  | 50 m/z   | Set End Plate Offset  | -500 V    | Set Dry Gas      | 8.0 l/min |
| Scan End    | 1200 m/z | Set Collision Cell RF | 100.0 Vpp | Set Divert Valve | Waste     |

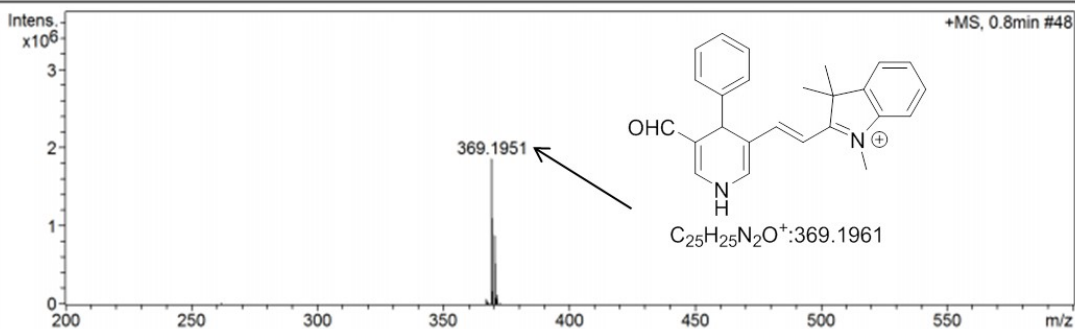

| Meas. m/z | # | Formula                                          | m/z      | err [ppm] | Mean err [ppm] | rdb  | N-Rule | Charge | Conf | mSigma | Std I  | Std Mean m/z | Std VarNorm | Std m/z Diff | Std Com Dev |
|-----------|---|--------------------------------------------------|----------|-----------|----------------|------|--------|--------|------|--------|--------|--------------|-------------|--------------|-------------|
| 369.1951  | 1 | C <sub>25</sub> H <sub>25</sub> N <sub>2</sub> O | 369.1961 | 2.9       | 3.1            | 14.5 | ok     | even   |      | 115.27 | 0.1485 | 0.0012       | 0.0623      | 0.0001       | 0.8427      |

Figure S11 High-resolution mass spectra of Compound 3.

## Mass Spectrum SmartFormula Report

|                      |                                                          |                   |                     |
|----------------------|----------------------------------------------------------|-------------------|---------------------|
| <b>Analysis Info</b> |                                                          | Acquisition Date  | 2020/12/9 15:42:18  |
| Analysis Name        | C:\Users\Administrator\Desktop\CN\XLQ1_P1-F-6_01_17653.d | Operator          | zlwei               |
| Method               | lc-ms-hr-low.m                                           | Instrument / Ser# | micrOTOF-Q II 10351 |
| Sample Name          | XLQ1                                                     |                   |                     |
| Comment              |                                                          |                   |                     |

|                              |          |                       |           |                  |           |
|------------------------------|----------|-----------------------|-----------|------------------|-----------|
| <b>Acquisition Parameter</b> |          |                       |           |                  |           |
| Source Type                  | ESI      | Ion Polarity          | Positive  | Set Nebulizer    | 0.6 Bar   |
| Focus                        | Active   | Set Capillary         | 4500 V    | Set Dry Heater   | 200 °C    |
| Scan Begin                   | 50 m/z   | Set End Plate Offset  | -500 V    | Set Dry Gas      | 8.0 l/min |
| Scan End                     | 1200 m/z | Set Collision Cell RF | 100.0 Vpp | Set Divert Valve | Waste     |

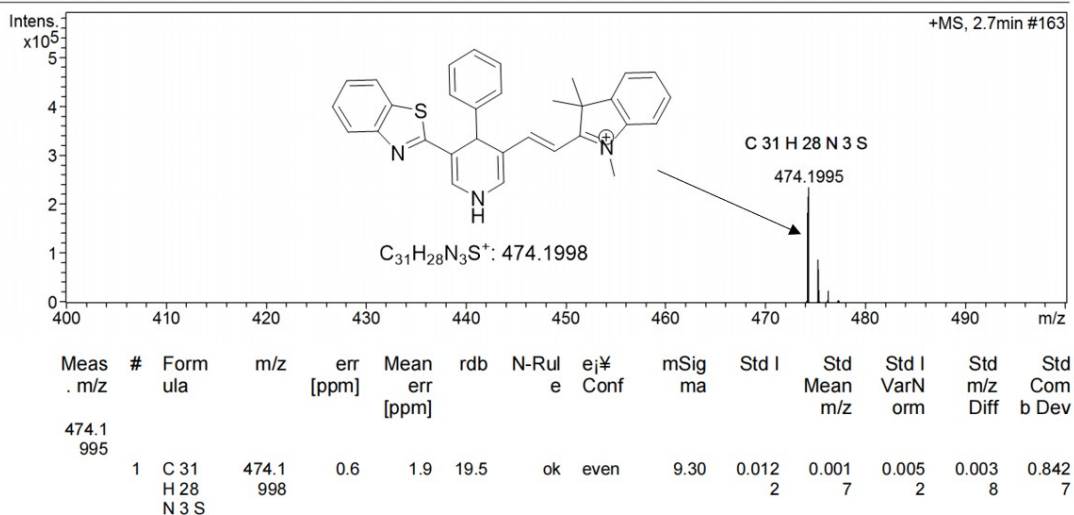

Figure S12 High-resolution mass spectra of Compound PTI.

Table 1: Viscosity value corresponding to different glycerol volume fraction

| Gly/V%            | 0   | 10  | 20  | 30  | 40   | 50   | 60   | 70    | 80    | 90    | 99     |
|-------------------|-----|-----|-----|-----|------|------|------|-------|-------|-------|--------|
| <b>Viscous/cp</b> | 1.5 | 2.5 | 6.0 | 9.8 | 18.0 | 36.5 | 74.0 | 140.0 | 270.0 | 665.0 | 1100.0 |

Table 1: Viscosity value corresponding to different glycerol volume fraction

Table 2: The corresponding viscosity of the probe solution at different temperatures

| temperature/°C      | 20  | 25  | 30  | 35  | 40  | 45  | 50 |
|---------------------|-----|-----|-----|-----|-----|-----|----|
| <b>Viscosity/cp</b> | 635 | 425 | 300 | 210 | 150 | 115 | 90 |

Table 2: The corresponding viscosity of the probe solution at different temperatures

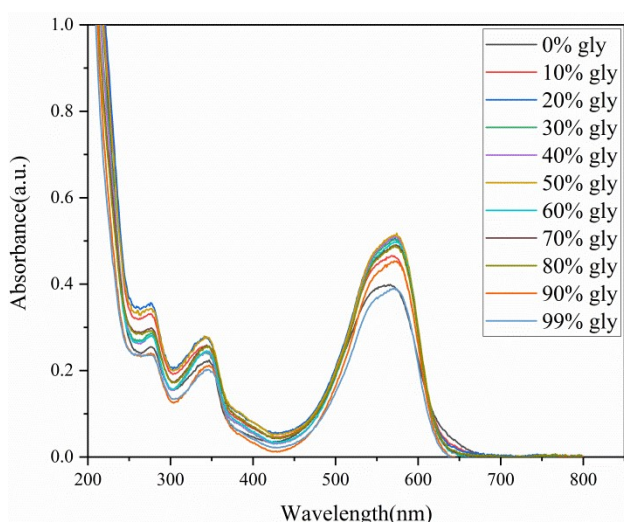

Figure S13 absorbance spectrum of probe PTI (10  $\mu$ M) with increasing viscosity.

Table 3: Comparison table of different fluorophore viscosity probes

| Fluorophore              | Viscosity solvent system | Mitochondrial targeting | Emission wavelength | References |
|--------------------------|--------------------------|-------------------------|---------------------|------------|
| diethylamino coumarin    | methanol and glycerol    | No                      | 634nm               | 1          |
| benzothiazole-based      | methanol and glycerol    | Yes                     | 583nm               | 2          |
| “distorted-BODIPY”-based | water and glycerol       | No                      | 538nm               | 3          |
| 4-aminobenzaldehyde      | water and glycerol       | Yes                     | 583nm               | 4          |
| 6-substituted quinoline  | water and glycerol       | No                      | 490nm               | 5          |
| carbazole                | ethanol and glycerol     | Yes                     | 545nm               | 6          |
| 1,4-dihydropyridine      | ethanol and glycerol     | Yes                     | 625nm               | This work  |

1. L. Chen, Y. Feng, Y. Dang, C. Zhong and D. Chen, *Analytical and Bioanalytical Chemistry*, 2020, **412**, 7819-7826.
2. L. Tang, L. Zhou, X. Yan, K. Zhong, X. Gao, X. Liu and J. Li, *Dyes and Pigments*, 2020, **182**, 108644.
3. H. Zhu, J. Fan, M. Li, J. Cao, J. Wang and X. Peng, *Chemistry—A European Journal*, 2014, **20**, 4691-4696.
4. B. Chen, C. Li, J. Zhang, J. Kan, T. Jiang, J. Zhou and H. Ma, *Chemical communications (Cambridge, England)*, 2019, **55**, 7410-7413.
5. P. Ning, P. Dong, Q. Geng, L. Bai, Y. Ding, X. Tian, R. Shao, L. Li and X. Meng, *Journal of Materials Chemistry B*, 2017, **5**, 2743-2749.

6. K. Zhou, M. Ren, B. Deng and W. Lin, *New Journal of Chemistry*, 2017, **41**, 11507-11511.
